# Supplementary material
Source: PubMed Central journal article supplement (PMC4474526)

A

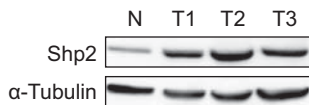

B

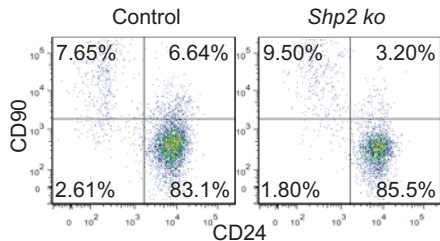

C

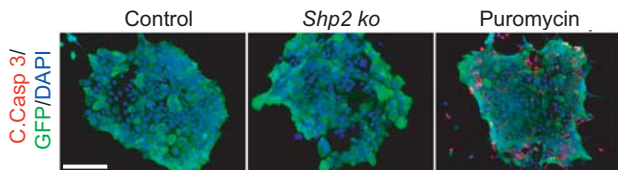

D

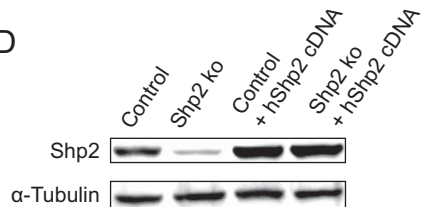

E

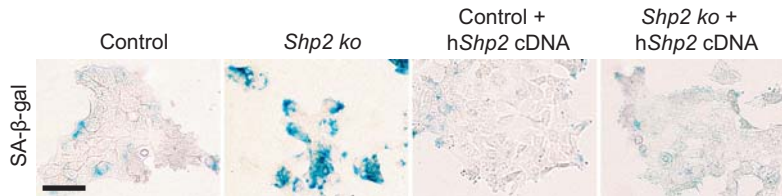

F

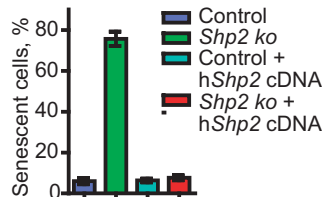

Supplement: embj0034-1493-sd1.pdf [file embj0034-1493-sd1.pdf]

Source data for Figure 3D, 3E

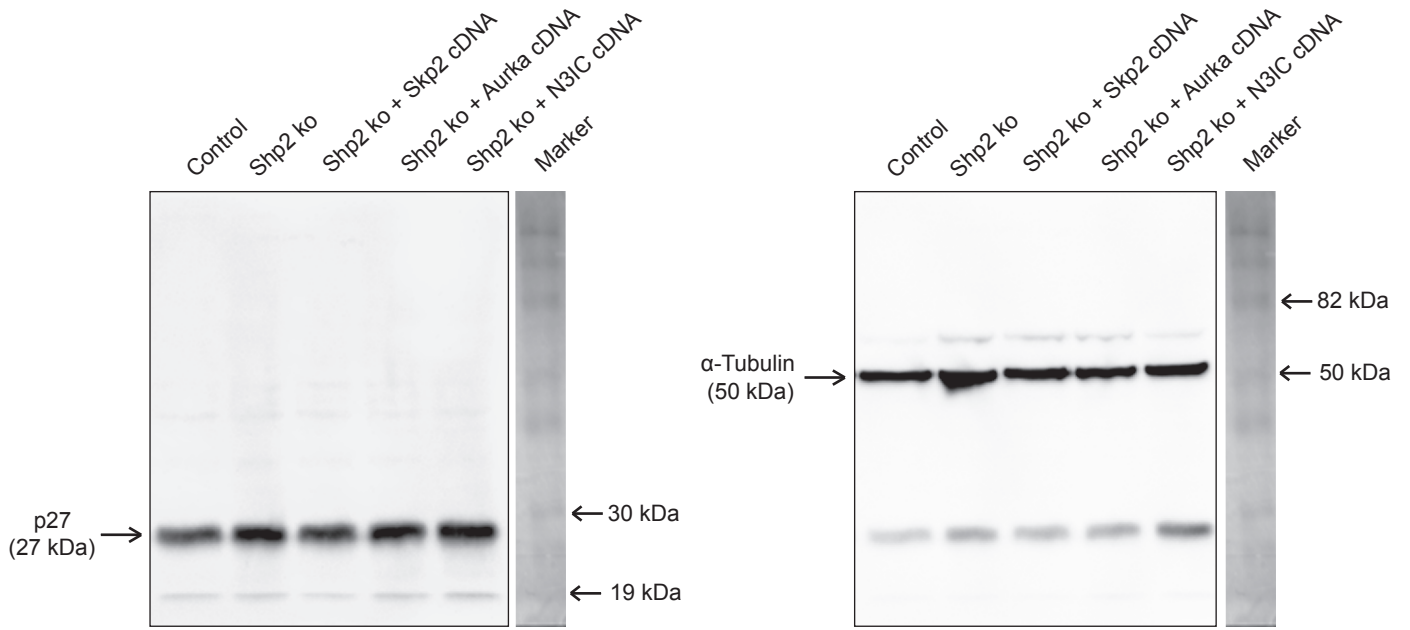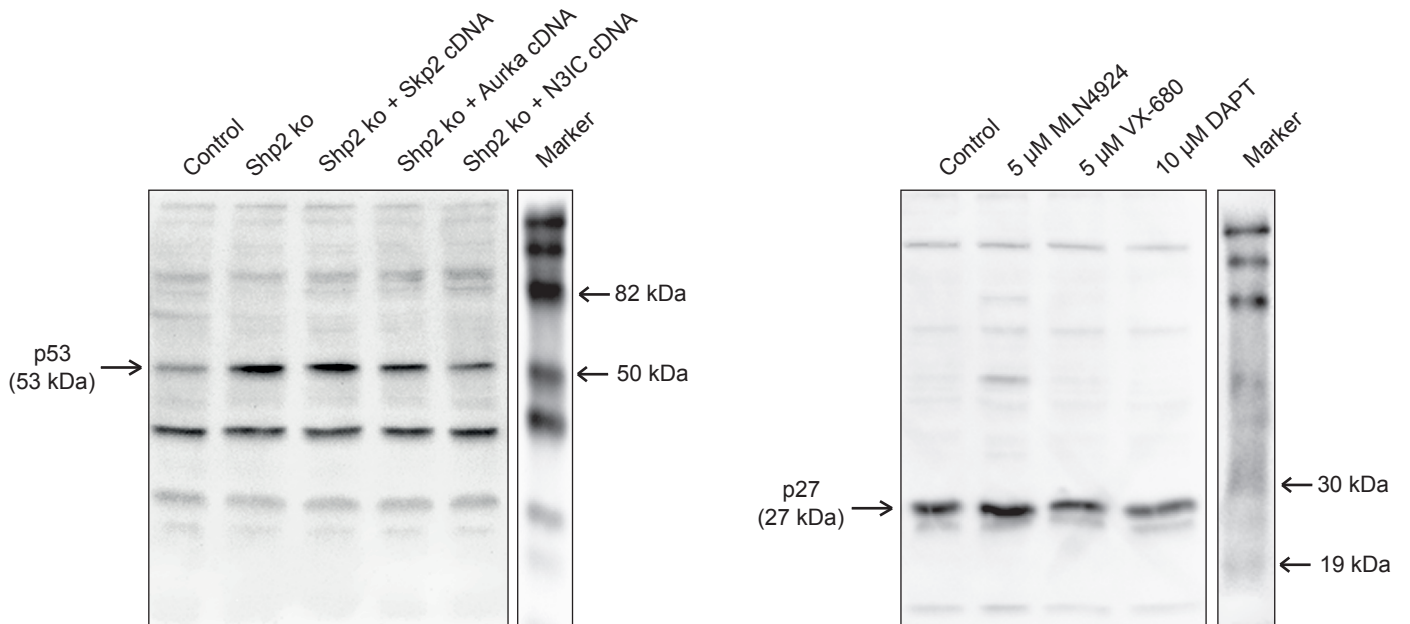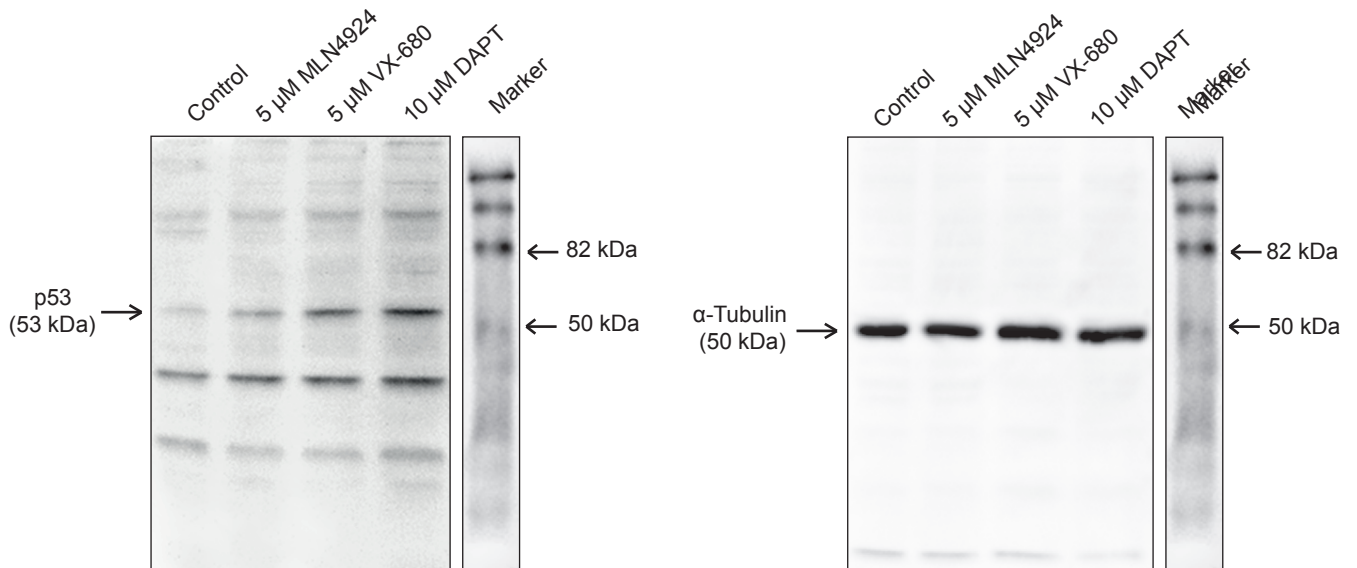

Supplement: embj0034-1493-sd16.pdf [file embj0034-1493-sd16.pdf]

## Source data for Figure 4D

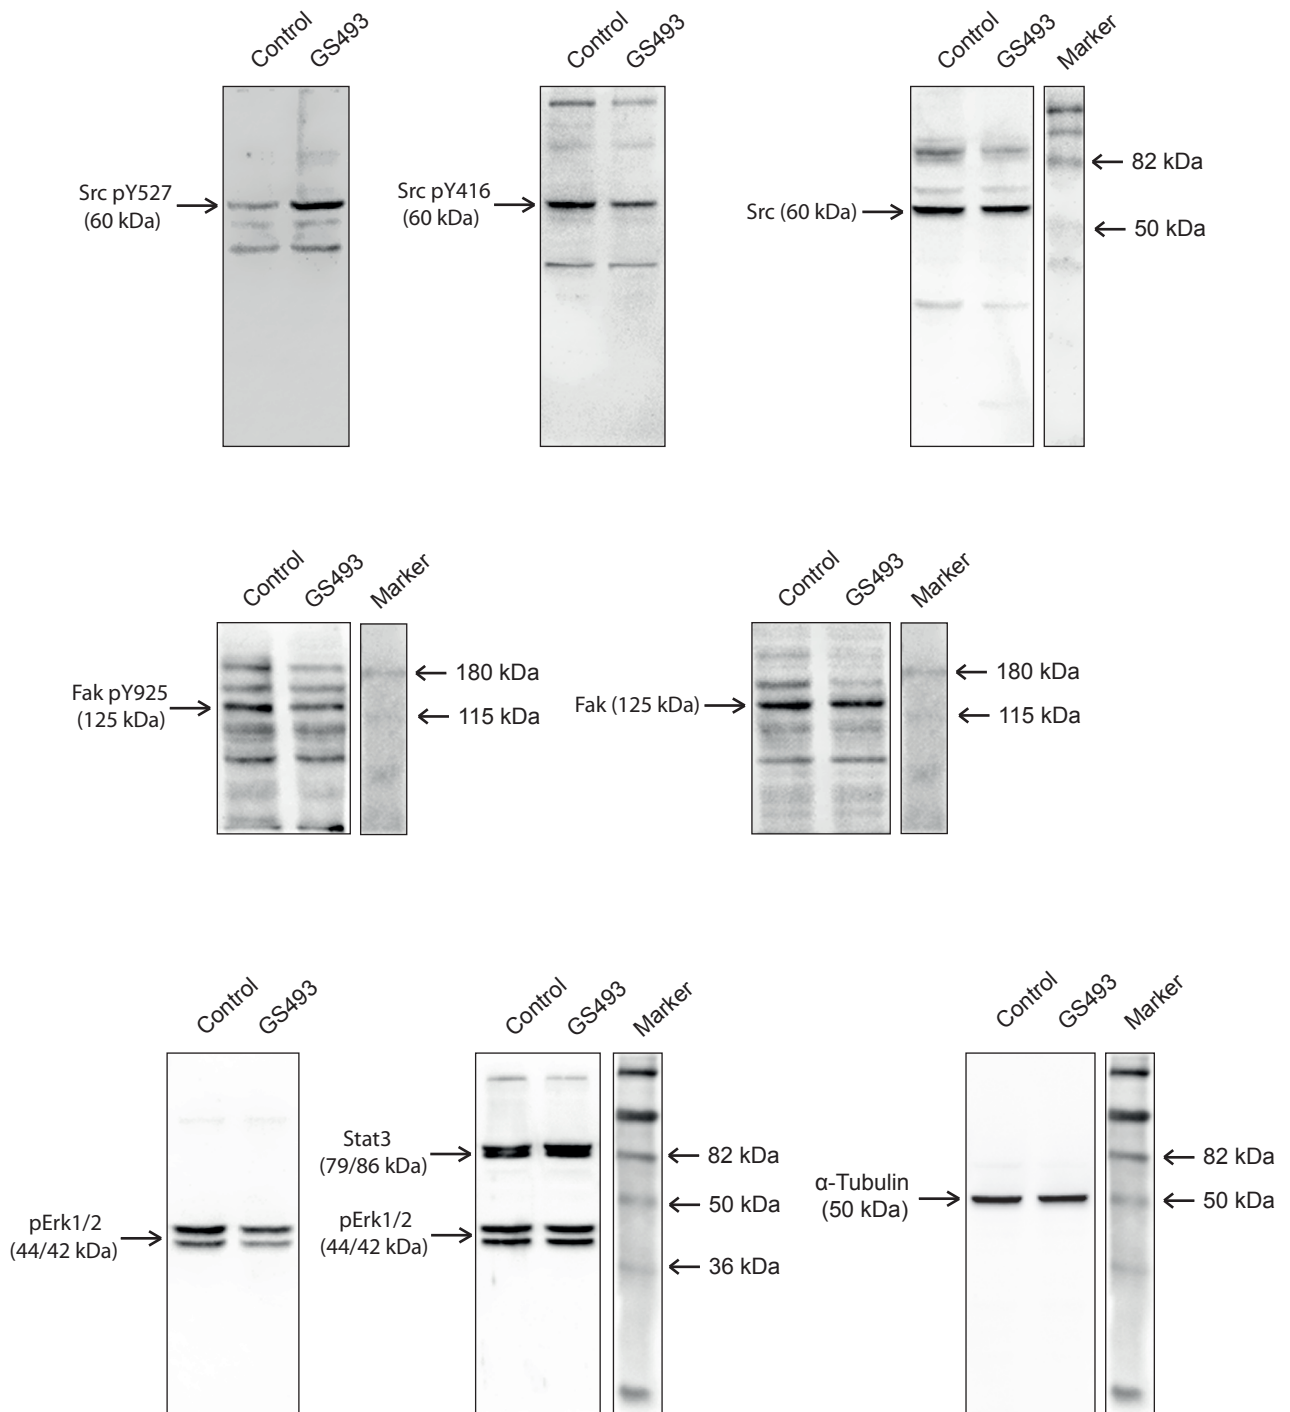

Supplement: embj0034-1493-sd17.pdf [file embj0034-1493-sd17.pdf]

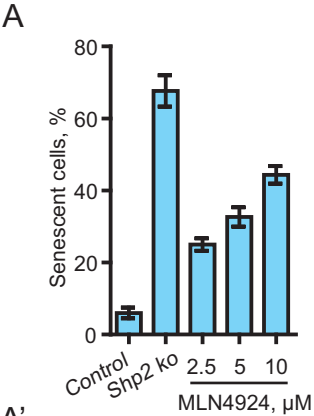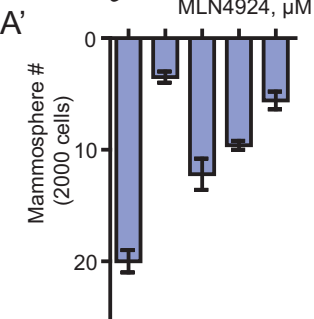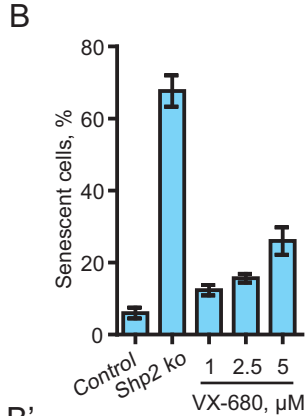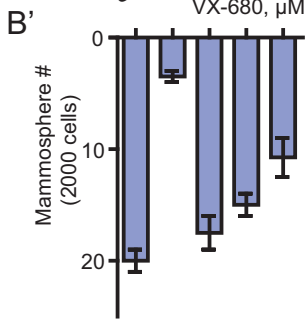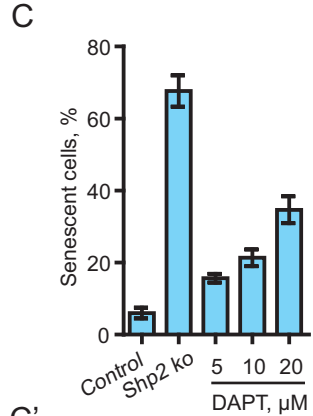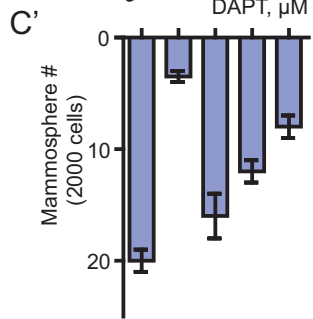

Supplement: embj0034-1493-sd2.pdf [file embj0034-1493-sd2.pdf]

A

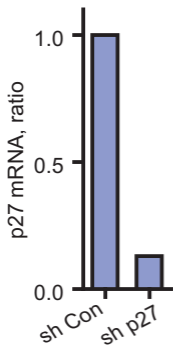

B

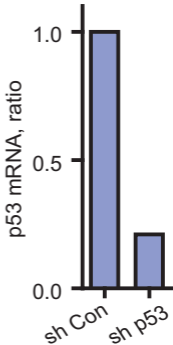

Supplement: embj0034-1493-sd3.pdf [file embj0034-1493-sd3.pdf]

A

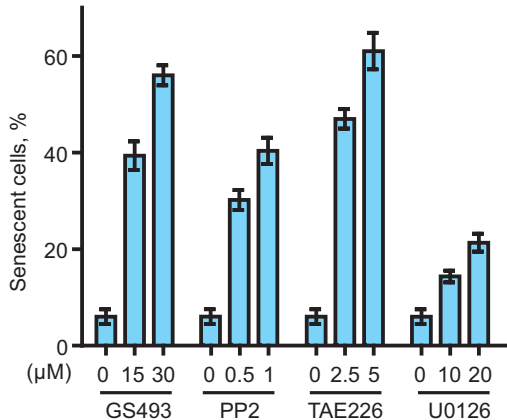

B

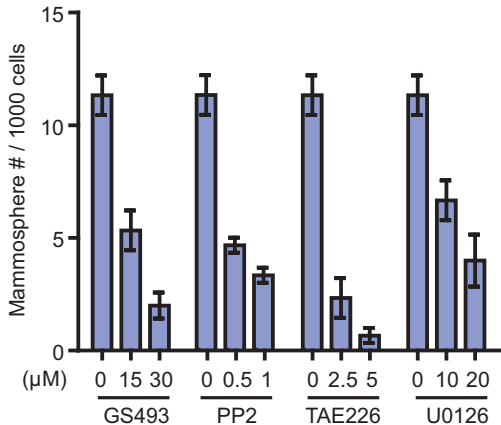

Supplement: embj0034-1493-sd4.pdf [file embj0034-1493-sd4.pdf]

A

Dowregulated genes

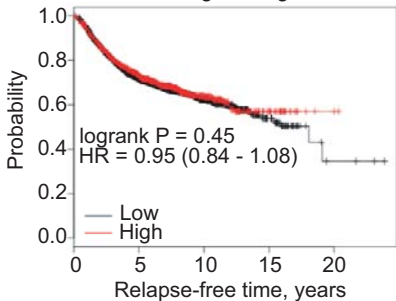

B

Upregulated genes

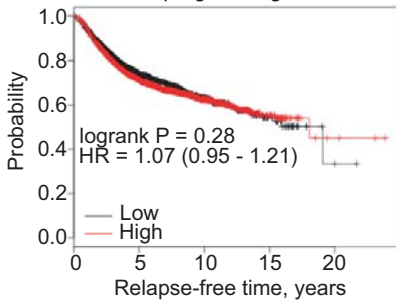

**Lan et al, Supplementary Figure S5**

Supplement: embj0034-1493-sd5.pdf [file embj0034-1493-sd5.pdf]

A

*MMTV-Cre;EYFP<sup>-fl</sup>*

EYFP

EYFP/CK8

6 weeks

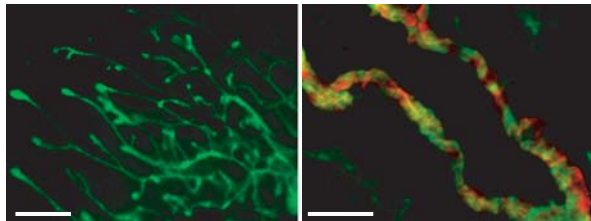

B

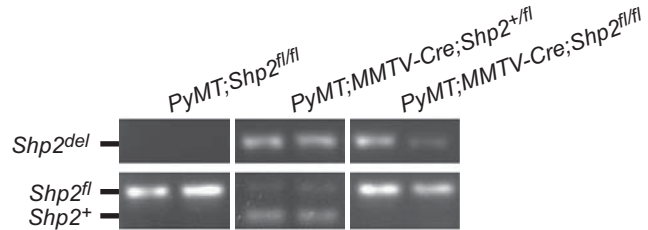

Lan et al, Supplementary Figure S6

Supplement: embj0034-1493-sd6.pdf [file embj0034-1493-sd6.pdf]

A

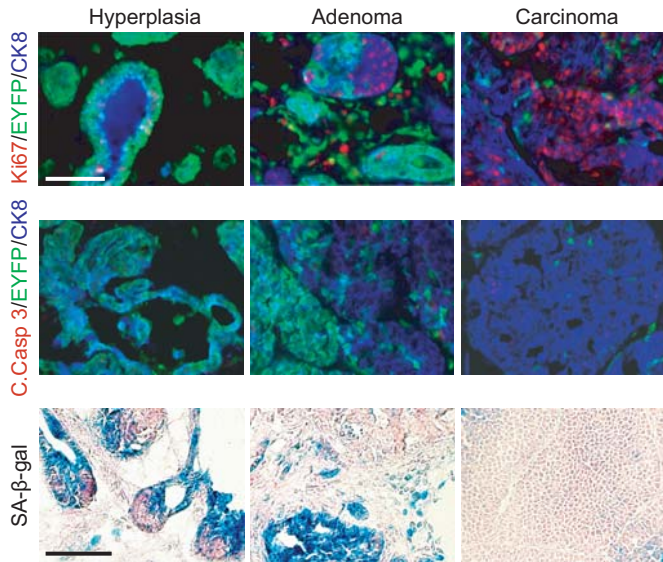

B

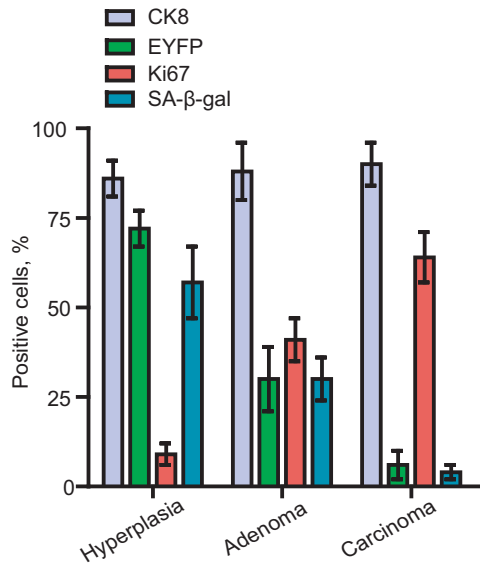

Supplement: embj0034-1493-sd7.pdf [file embj0034-1493-sd7.pdf]

**A**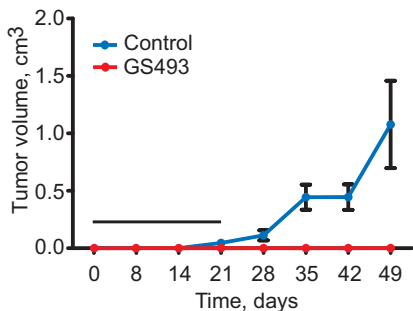**B**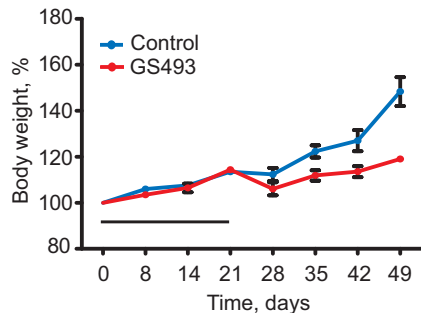**C**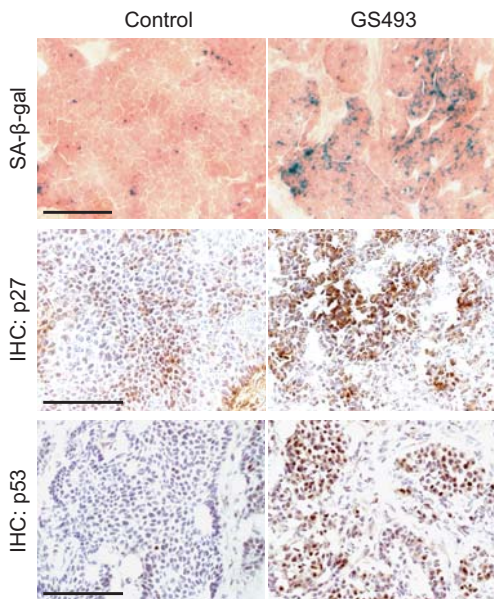**D**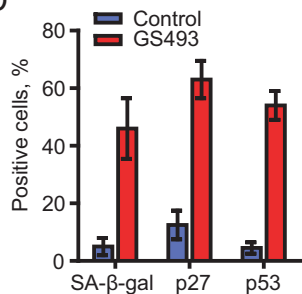**E**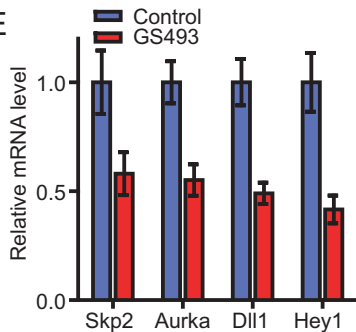

Supplement: embj0034-1493-sd8.pdf [file embj0034-1493-sd8.pdf]
